# Supplementary material for: FeS2and WO3nanoparticles decorated on biochar as a high throughput electrode for supercapacitors
Source: Royal Society of Chemistry journal article supplement (doi:10.1039/d3cp01926h), 2023-01-01
Supplement: d3cp01926h1.pdf [file d3cp01926h1.pdf]

## Electronic Supplementary Information

### **FeS<sub>2</sub> and WO<sub>3</sub> Nanoparticles Decorated on Biochar as High Throughput Electrodes for Supercapacitor**

*Waris .<sup>a,b</sup>, Fahad Abdulaziz<sup>c</sup>, Salman Latif<sup>e</sup>, Abdulaziz Alanazi<sup>d</sup>, Mohammad Zain Khan<sup>a,b\*</sup>*

*<sup>a</sup>Department of Chemistry, Faculty of Science, Aligarh Muslim University, Aligarh, 202002, India*

*<sup>b</sup>Electrochemical Research Laboratory, Department of Industrial Chemistry, Faculty of Science, Aligarh Muslim University, Aligarh, 202002, India*

*<sup>c</sup>Department of Chemistry, College of Science, University of Ha'il, Ha'il, 81451, Saudi Arabia*

*<sup>d</sup>Department of Chemistry, College of Science and Humanities in Al-Kharj, Prince Sattam bin Abdulaziz University, Al-Kharj, 11942, Saudi Arabia*

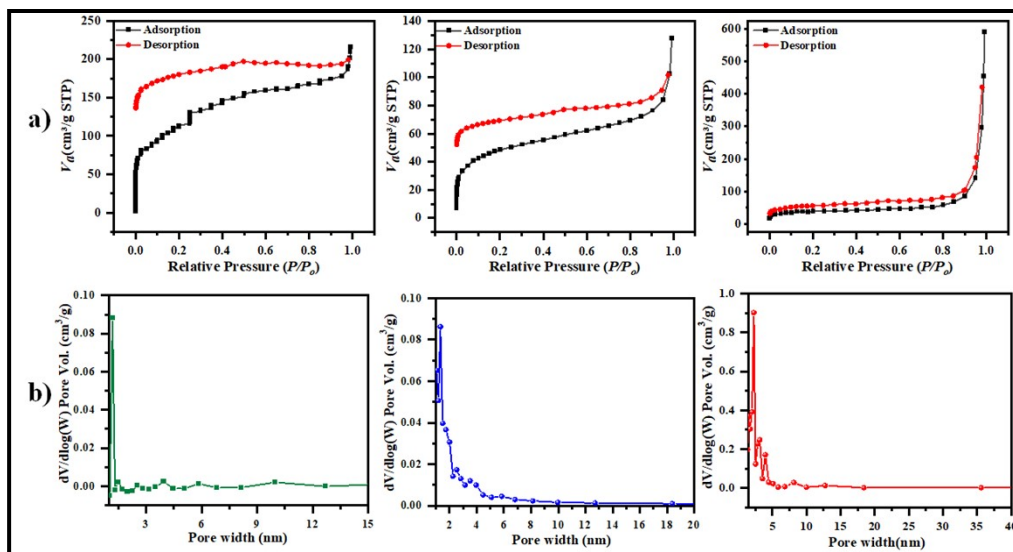

**Figure S1.**  $N_2$  adsorption-desorption isotherms (a) and pore size distribution (b) of the biochar, biochar/FeS<sub>2</sub>, and biochar/FeS<sub>2</sub>/WO<sub>3</sub> composites.
